# Supplementary material for: Clonal raider ant brain transcriptomics identifies candidate molecular mechanisms for reproductive division of labor
Source: PubMed Central journal article supplement (PMC6090591; doi:10.1186/s12915-018-0558-8), 2018-08-13

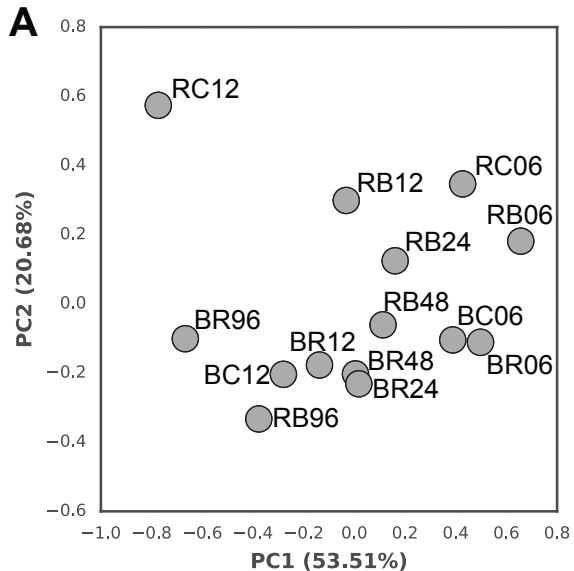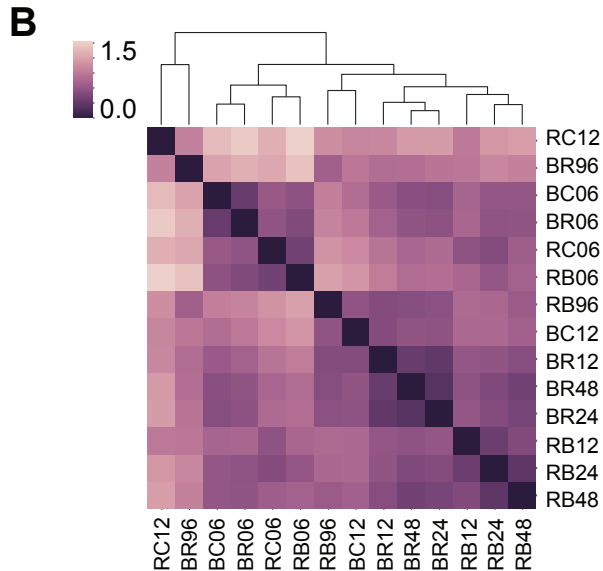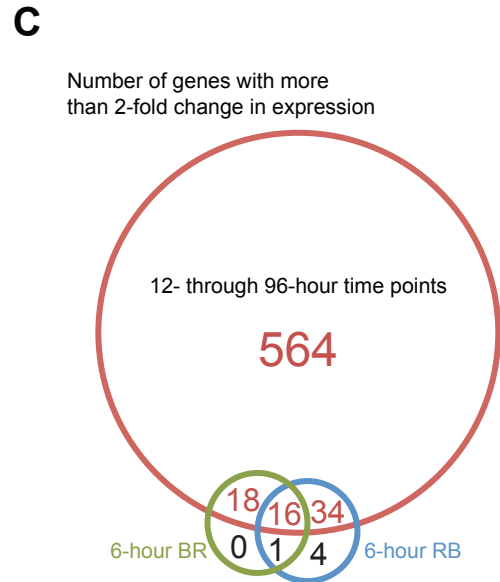

Supplement: 12915_2018_558_MOESM1_ESM.pdf [file 12915_2018_558_MOESM1_ESM.pdf]
