# Supplementary material for: Clonal raider ant brain transcriptomics identifies candidate molecular mechanisms for reproductive division of labor
Source: PubMed Central journal article supplement (PMC6090591; doi:10.1186/s12915-018-0558-8), 2018-08-13
Supplement: 12915_2018_558_MOESM2_ESM.pdf [file 12915_2018_558_MOESM2_ESM.pdf]

| Rank | Gene ID        | Adjusted p-value | Annotation                                                      |
|------|----------------|------------------|-----------------------------------------------------------------|
| 1    | LOC105277456   | 2.86E-27         | protein-L-isoaspartate(D-aspartate) O-methyltransferase         |
| 2    | LOC105277457   | 2.09E-24         | equilibrative nucleoside transporter 1                          |
| 3    | LOC105278524   | 5.91E-18         | ILP2                                                            |
| 4    | LOC105281428_Q | 1.25E-16         | queen vitellogenin                                              |
| 5    | LOC105275236   | 1.75E-16         | carboxypeptidase M                                              |
| 6    | LOC105284539   | 2.37E-12         | sodium- and chloride-dependent glycine transporter 1            |
| 7    | LOC105279766   | 2.72E-12         | uncharacterized LOC105279766                                    |
| 8    | LOC105279851   | 2.05E-11         | yrdC domain-containing protein                                  |
| 9    | LOC105275986   | 8.19E-11         | uncharacterized LOC105275985                                    |
| 10   | LOC105276495   | 1.17E-10         | general odorant-binding protein 69a                             |
| 11   | LOC105285597   | 3.44E-10         | uncharacterized LOC105285597                                    |
| 12   | LOC105281011   | 1.12E-09         | transferrin                                                     |
| 13   | LOC105285466   | 2.11E-09         | uncharacterized LOC105285466                                    |
| 14   | LOC105283669   | 7.35E-09         | spermine synthase                                               |
| 15   | LOC105276905   | 8.06E-09         | neural/ectodermal development factor IMP-L2                     |
| 16   | LOC105275762   | 1.75E-08         | protein aubergine                                               |
| 17   | LOC105280170   | 4.95E-08         | PI-PLC X domain-containing protein 2                            |
| 18   | LOC105281012   | 4.95E-08         | uncharacterized LOC105281012                                    |
| 19   | LOC105285380   | 6.73E-08         | chitooligosaccharidolytic beta-N-acetylglucosaminidase          |
| 20   | LOC105277400   | 2.52E-07         | aldose 1-epimerase                                              |
| 21   | LOC105279907   | 4.37E-07         | uncharacterized LOC105279907                                    |
| 22   | LOC105285376   | 4.71E-07         | uncharacterized LOC105285376                                    |
| 23   | LOC105280731   | 5.52E-07         | inositol monophosphatase 1                                      |
| 24   | LOC105275113   | 8.88E-07         | pancreatic lipase-related protein 2-like                        |
| 25   | LOC105276066   | 1.03E-06         | uncharacterized LOC105276066                                    |
| 26   | LOC105275269   | 1.09E-06         | uncharacterized LOC105275269                                    |
| 27   | LOC105276731   | 1.09E-06         | uncharacterized LOC105276731                                    |
| 28   | LOC105283821   | 1.09E-06         | nucleolar protein 6                                             |
| 29   | LOC105278211   | 1.54E-06         | centromere protein I                                            |
| 30   | LOC105276018   | 1.94E-06         | peroxisomal hydratase-dehydrogenase-epimerase                   |
| 31   | LOC105277056   | 1.94E-06         | neuroparsin-A                                                   |
| 32   | LOC105288064   | 3.80E-06         | uncharacterized LOC105288064                                    |
| 33   | LOC105281928   | 5.80E-06         | L-asparaginase 1                                                |
| 34   | LOC105285607   | 6.17E-06         | probable ribosome production factor 1                           |
| 35   | LOC105286129   | 6.88E-06         | homeobox protein TGIF2LX                                        |
| 36   | LOC105280465   | 9.64E-06         | uncharacterized LOC105280465                                    |
| 37   | LOC105281340   | 9.64E-06         | sphingomyelin phosphodiesterase                                 |
| 38   | LOC105283223   | 9.64E-06         | putative mediator of RNA polymerase II transcription subunit 26 |
| 39   | LOC105279511   | 9.67E-06         | uncharacterized LOC105279511                                    |
| 40   | LOC105281817   | 1.08E-05         | uncharacterized LOC105281817                                    |
| 41   | LOC105286755   | 1.08E-05         | peptidyl-prolyl cis-trans isomerase 5                           |
| 42   | LOC105282988   | 1.18E-05         | sodium/potassium-transporting ATPase subunit alpha              |
| 43   | LOC105277203   | 1.24E-05         | RNA polymerase I-specific transcription initiation factor RRN3  |
| 44   | LOC105281008   | 1.45E-05         | glutamate receptor ionotropic                                   |
| 45   | LOC105286732   | 1.65E-05         | anillin                                                         |
| 46   | LOC105281609   | 1.97E-05         | small subunit processome component 20 homolog                   |
| 47   | LOC105285940   | 2.17E-05         | THAP domain-containing protein 3                                |
| 48   | LOC105281708   | 2.20E-05         | uncharacterized LOC105281708                                    |
| 49   | LOC105281726   | 2.43E-05         | ferrochelatase                                                  |
| 50   | LOC105280087   | 2.72E-05         | protein regulator of cytokinesis 1                              |
| 51   | LOC105279867   | 2.74E-05         | growth factor receptor-bound protein 14                         |
| 52   | LOC105283177   | 4.99E-05         | glutathione S-transferase                                       |
| 53   | LOC105276918   | 5.07E-05         | 14-3-3 protein epsilon                                          |
| 54   | LOC105285920   | 5.07E-05         | vegetative cell wall protein gp1                                |
| 55   | LOC105276675   | 5.36E-05         | NK-tumor recognition protein                                    |
| 56   | LOC105284285   | 5.36E-05         | high affinity cAMP-specific and IBMX-insensitive 3'             |
| 57   | LOC105280553   | 5.43E-05         | uncharacterized LOC105280553                                    |
| 58   | LOC105279540   | 5.72E-05         | N-sulphoglucosamine sulphohydrolase                             |
| 59   | LOC105282075   | 5.77E-05         | structural maintenance of chromosomes protein 5                 |
| 60   | LOC105282643   | 7.25E-05         | PDZ and LIM domain protein 4                                    |
| 61   | LOC105283185   | 7.50E-05         | kinetochore-associated protein 1                                |
| 62   | LOC105287151   | 8.77E-05         | D-beta-hydroxybutyrate dehydrogenase                            |
| 63   | LOC105286142   | 9.53E-05         | cyclin-dependent kinases regulatory subunit                     |
| 64   | LOC105277367   | 0.000105047      | twinkle protein                                                 |
| 65   | LOC105283914   | 0.000105319      | mitochondrial import receptor subunit TOM70                     |

|     |              |             |                                                                       |
|-----|--------------|-------------|-----------------------------------------------------------------------|
| 66  | LOC105282416 | 0.000109464 | uncharacterized LOC105282416                                          |
| 67  | LOC105277606 | 0.000118589 | titin                                                                 |
| 68  | LOC105285641 | 0.000129828 | EP300-interacting inhibitor of differentiation 3                      |
| 69  | LOC105286010 | 0.000132779 | major facilitator superfamily domain-containing protein 12            |
| 70  | LOC105287874 | 0.000145545 | NADH-ubiquinone oxidoreductase 49 kDa subunit                         |
| 71  | LOC105276419 | 0.000151946 | uncharacterized protein C18orf63                                      |
| 72  | LOC105282036 | 0.000151946 | G2/mitotic-specific cyclin-B                                          |
| 73  | LOC105282150 | 0.000151946 | ATP synthase subunit alpha                                            |
| 74  | LOC105275344 | 0.000168939 | ejaculatory bulb-specific protein 3                                   |
| 75  | LOC105276174 | 0.000175408 | sodium/potassium-transporting ATPase subunit beta-2                   |
| 76  | LOC105278710 | 0.000176586 | cyclin-dependent kinase 1                                             |
| 77  | LOC105281832 | 0.000181294 | nucleolar protein 58                                                  |
| 78  | LOC105279728 | 0.000206086 | uncharacterized LOC105279728                                          |
| 79  | LOC105279314 | 0.000213503 | trypsin inhibitor                                                     |
| 80  | LOC105287013 | 0.000213503 | kinesin-like protein KIF20B                                           |
| 81  | LOC105280074 | 0.000220032 | uncharacterized LOC105280074                                          |
| 82  | LOC105275711 | 0.000229201 | TATA box-binding protein-associated factor RNA polymerase I subunit B |
| 83  | LOC105280641 | 0.000231988 | serine/threonine-protein kinase VRK1                                  |
| 84  | LOC105279847 | 0.000235166 | uncharacterized LOC105279847                                          |
| 85  | LOC105282680 | 0.00025994  | glucosylceramidase                                                    |
| 86  | LOC105279763 | 0.000261952 | glutamate receptor ionotropic                                         |
| 87  | LOC105279565 | 0.000268443 | transcriptional regulator ATRX                                        |
| 88  | LOC105288139 | 0.000292672 | uncharacterized LOC105288139                                          |
| 89  | LOC105279557 | 0.000301454 | kinesin-like protein KIF19                                            |
| 90  | LOC105283374 | 0.000301454 | poly(A) RNA polymerase gld-2 homolog A                                |
| 91  | LOC105286171 | 0.000319218 | contactin-4                                                           |
| 92  | LOC105285834 | 0.000381783 | ATP-dependent DNA helicase Q5                                         |
| 93  | LOC105274638 | 0.000388134 | kinesin-like protein KIF18A                                           |
| 94  | LOC105284189 | 0.000389058 | fidgetin-like protein 1                                               |
| 95  | LOC105285614 | 0.000413081 | glycerol-3-phosphate dehydrogenase [NAD(+)]                           |
| 96  | LOC105274740 | 0.000434313 | putative leucine-rich repeat-containing protein DDB_G0290503          |
| 97  | LOC105277839 | 0.000434313 | ribosomal protein S6 kinase beta-1                                    |
| 98  | LOC105281660 | 0.000442336 | interleukin enhancer-binding factor 2                                 |
| 99  | LOC105276143 | 0.000465598 | NGFI-A-binding protein homolog                                        |
| 100 | LOC105277886 | 0.000499745 | glutamate-gated chloride channel                                      |
| 101 | LOC105279186 | 0.000549461 | probable RNA-binding protein 19                                       |
| 102 | LOC105280308 | 0.000549461 | Fanconi anemia group D2 protein homolog                               |
| 103 | LOC105280529 | 0.000549461 | uncharacterized LOC105280529                                          |
| 104 | LOC105282076 | 0.000549461 | small lysine-rich protein 1                                           |
| 105 | LOC105286277 | 0.000549461 | palmitoyltransferase ZDHHC3                                           |
| 106 | LOC105275889 | 0.000572928 | uncharacterized LOC105275889                                          |
| 107 | LOC105275854 | 0.000582604 | annulin                                                               |
| 108 | LOC105276290 | 0.000582604 | nuclear pore complex protein Nup88                                    |
| 109 | LOC105280511 | 0.000585378 | glucose dehydrogenase [FAD]                                           |
| 110 | LOC105286952 | 0.000608702 | uncharacterized LOC105286952                                          |
| 111 | LOC105285125 | 0.000611241 | endoribonuclease Dicer                                                |
| 112 | LOC105282639 | 0.000620718 | lachesin                                                              |
| 113 | LOC105275876 | 0.000649572 | diuretic hormone class 2                                              |
| 114 | LOC105279470 | 0.000649572 | signal peptidase complex subunit 1                                    |
| 115 | LOC105277844 | 0.000663379 | cytochrome P450 CYP12A2                                               |
| 116 | LOC105281212 | 0.000702038 | protein rhomboid                                                      |
| 117 | LOC105283509 | 0.000717333 | zinc finger BED domain-containing protein 1-like                      |
| 118 | LOC105276079 | 0.000720172 | uncharacterized LOC105276079                                          |
| 119 | LOC105286126 | 0.000720172 | succinate dehydrogenase [ubiquinone] iron-sulfur subunit              |
| 120 | LOC105283079 | 0.000755324 | midasin                                                               |
| 121 | LOC105276628 | 0.000766774 | uncharacterized MFS-type transporter C09D4.1                          |
| 122 | LOC105278567 | 0.000766774 | zinc finger BED domain-containing protein 1                           |
| 123 | LOC105283043 | 0.000775008 | uncharacterized LOC105283043                                          |
| 124 | LOC105283843 | 0.000775008 | phosphatidylinositol transfer protein alpha isoform                   |
| 125 | LOC105286179 | 0.000775008 | uncharacterized LOC105286179                                          |
| 126 | LOC105288016 | 0.000775008 | synaptic vesicular amine transporter                                  |
| 127 | LOC105276979 | 0.000791533 | isocitrate dehydrogenase [NAD] subunit beta                           |
| 128 | LOC105286439 | 0.000826073 | uncharacterized LOC105286439                                          |
| 129 | LOC105277700 | 0.000859212 | actin                                                                 |
| 130 | LOC105274628 | 0.000891361 | uncharacterized LOC105274628                                          |
| 131 | LOC105280285 | 0.00089511  | uncharacterized protein CG1785                                        |
| 132 | LOC105288014 | 0.000939241 | HEAT repeat-containing protein 1                                      |

|     |              |             |                                                              |
|-----|--------------|-------------|--------------------------------------------------------------|
| 133 | LOC105281721 | 0.000973321 | uncharacterized LOC105281721                                 |
| 134 | LOC105283157 | 0.000973321 | carbonic anhydrase 2                                         |
| 135 | LOC105283626 | 0.000973321 | uncharacterized LOC105283626                                 |
| 136 | LOC105287187 | 0.000973321 | non-homologous end-joining factor 1                          |
| 137 | LOC105276512 | 0.00103448  | S-methyl-5'-thioadenosine phosphorylase                      |
| 138 | LOC105277421 | 0.00103448  | protein timeless homolog                                     |
| 139 | LOC105279939 | 0.001075557 | lymphokine-activated killer T-cell-originated protein kinase |
| 140 | LOC105276690 | 0.001096309 | folylpolyglutamate synthase                                  |
| 141 | LOC105275469 | 0.001107455 | sarcalumenin                                                 |
| 142 | LOC105285890 | 0.001107455 | uncharacterized LOC105285890                                 |
| 143 | LOC105283266 | 0.001121027 | lymphoid-specific helicase                                   |
| 144 | LOC105276925 | 0.001123963 | protein seele                                                |
| 145 | LOC105287204 | 0.001123963 | twitchin                                                     |
| 146 | LOC105276190 | 0.001155579 | protein brambleberry                                         |
| 147 | LOC105279559 | 0.001155579 | glycine receptor subunit alpha-2-like                        |
| 148 | LOC105280561 | 0.001172392 | calmodulin                                                   |
| 149 | LOC105278661 | 0.001211963 | ribonucleases P/MRP protein subunit POP1                     |
| 150 | LOC105278082 | 0.001262696 | ADP-ribosylation factor-like protein 13B                     |
| 151 | LOC105284604 | 0.001354385 | general odorant-binding protein 83a                          |
| 152 | LOC105287093 | 0.001396307 | uncharacterized LOC105287093                                 |
| 153 | LOC105284249 | 0.001459572 | ribosomal RNA processing protein 1 homolog                   |
| 154 | LOC105284986 | 0.001480837 | ribonucleoside-diphosphate reductase large subunit           |
| 155 | LOC105283698 | 0.001521001 | pyridoxine-5'-phosphate oxidase                              |
| 156 | LOC105282844 | 0.001531753 | uncharacterized LOC105282844                                 |
| 157 | LOC105276853 | 0.001584309 | uncharacterized LOC105276853                                 |
| 158 | LOC105287282 | 0.001590122 | nucleotide exchange factor SIL1                              |
| 159 | LOC105285386 | 0.00171934  | nucleoporin Nup37                                            |
| 160 | LOC105275345 | 0.001775821 | ejaculatory bulb-specific protein 3                          |
| 161 | LOC105287530 | 0.001775821 | WD repeat-containing protein 46                              |
| 162 | LOC105279696 | 0.001802057 | uncharacterized LOC105279696                                 |
| 163 | LOC105280503 | 0.001861233 | glucose dehydrogenase [FAD                                   |
| 164 | LOC105286339 | 0.001892283 | RRP12-like protein                                           |
| 165 | LOC105277377 | 0.001910982 | troponin C                                                   |
| 166 | LOC105279473 | 0.001962256 | uncharacterized LOC105279473                                 |
| 167 | LOC105280338 | 0.001962256 | CAD protein                                                  |
| 168 | LOC105277875 | 0.00197776  | RNA-binding protein 40                                       |
| 169 | LOC105281005 | 0.001994437 | tubulin epsilon chain                                        |
| 170 | LOC105287193 | 0.002024743 | uncharacterized LOC105287193                                 |
| 171 | LOC105285809 | 0.002063242 | putative helicase MOV-10                                     |
| 172 | LOC105285704 | 0.002174642 | MATH and LRR domain-containing protein PFE0570w              |
| 173 | LOC105279590 | 0.002190403 | uncharacterized LOC105279590                                 |
| 174 | LOC105279671 | 0.002197433 | U3 small nucleolar RNA-associated protein 14 homolog A       |
| 175 | LOC105285187 | 0.002212392 | uncharacterized LOC105285187                                 |
| 176 | LOC105277039 | 0.002257698 | CAPA peptides                                                |
| 177 | LOC105277876 | 0.002257698 | adenylate kinase isoenzyme 1                                 |
| 178 | LOC105280242 | 0.002257698 | uncharacterized LOC105280242                                 |
| 179 | LOC105283045 | 0.002257698 | uncharacterized LOC105283045                                 |
| 180 | LOC105283429 | 0.002257698 | uridine phosphorylase 1                                      |
| 181 | LOC105286263 | 0.002257698 | ribonuclease P protein subunit p40                           |
| 182 | LOC105278693 | 0.002374317 | troponin C-like                                              |
| 183 | LOC105286776 | 0.002374317 | ribonucleoside-diphosphate reductase subunit M2 B            |
| 184 | LOC105283233 | 0.002468175 | fibrillin-1                                                  |
| 185 | LOC105284536 | 0.002470555 | uncharacterized LOC105284536                                 |
| 186 | LOC105287615 | 0.002622097 | nidogen-2                                                    |
| 187 | LOC105276738 | 0.002627827 | KH domain-containing protein akap-1                          |
| 188 | LOC105284373 | 0.002714911 | myosin light chain alkali                                    |
| 189 | LOC105287207 | 0.002888659 | kinesin-like protein Klp61F                                  |
| 190 | LOC105285677 | 0.003023458 | uncharacterized LOC105285677                                 |
| 191 | LOC105285139 | 0.003043257 | serine/threonine-protein kinase Chk2                         |
| 192 | LOC105277197 | 0.00317964  | putative sodium-dependent multivitamin transporter           |
| 193 | LOC105277432 | 0.003195212 | V-type proton ATPase subunit G                               |
| 194 | LOC105287079 | 0.003237844 | protein CNPPD1                                               |
| 195 | LOC105280404 | 0.003258013 | tankyrase-1                                                  |
| 196 | LOC105286412 | 0.003258013 | uncharacterized LOC105286412                                 |
| 197 | LOC105283216 | 0.003309992 | mycosubtilin synthase subunit C                              |
| 198 | LOC105274480 | 0.003328645 | zwei Ig domain protein zig-8                                 |
| 199 | LOC105280897 | 0.003328645 | titin                                                        |

|     |              |             |                                                                                                     |
|-----|--------------|-------------|-----------------------------------------------------------------------------------------------------|
| 200 | LOC105278020 | 0.003375831 | origin recognition complex subunit 2                                                                |
| 201 | LOC105283438 | 0.003471681 | tyrosine--tRNA ligase                                                                               |
| 202 | LOC105278746 | 0.003508497 | periodic tryptophan protein 1 homolog                                                               |
| 203 | LOC105284104 | 0.003563795 | uncharacterized LOC105284104                                                                        |
| 204 | LOC105285852 | 0.003563795 | nucleoside diphosphate kinase 6                                                                     |
| 205 | LOC105283164 | 0.003564436 | protein FAM60A                                                                                      |
| 206 | LOC105284641 | 0.003564436 | uncharacterized LOC105284641                                                                        |
| 207 | LOC105286766 | 0.003564436 | dynein heavy chain 7                                                                                |
| 208 | LOC105282386 | 0.003627323 | tRNA-specific adenosine deaminase 2                                                                 |
| 209 | LOC105281770 | 0.003726834 | phosphoglycerate mutase 1                                                                           |
| 210 | LOC105286356 | 0.003733126 | R3H and coiled-coil domain-containing protein 1                                                     |
| 211 | LOC105285273 | 0.003745615 | UDP-glucuronosyltransferase 2B1                                                                     |
| 212 | LOC105276762 | 0.003752298 | chaoptin                                                                                            |
| 213 | LOC105286471 | 0.003786951 | uncharacterized LOC105286471                                                                        |
| 214 | LOC105286745 | 0.003786951 | serine proteinase stubble                                                                           |
| 215 | LOC105287773 | 0.003786951 | uncharacterized LOC105287773                                                                        |
| 216 | LOC105281565 | 0.0039943   | maternal embryonic leucine zipper kinase                                                            |
| 217 | LOC105281396 | 0.00400507  | angiotensin-converting enzyme 2                                                                     |
| 218 | LOC105278260 | 0.004033359 | tRNA-splicing ligase RtcB homolog                                                                   |
| 219 | LOC105282051 | 0.004069005 | uncharacterized LOC105282051                                                                        |
| 220 | LOC105284988 | 0.004069005 | DNA primase large subunit                                                                           |
| 221 | LOC105277716 | 0.004092585 | facilitated trehalose transporter Tret1                                                             |
| 222 | LOC105278265 | 0.004107218 | uncharacterized LOC105278265                                                                        |
| 223 | LOC105282754 | 0.004152694 | protein yellow                                                                                      |
| 224 | LOC105284776 | 0.004152694 | uncharacterized LOC105284776                                                                        |
| 225 | LOC105275039 | 0.004204795 | uncharacterized LOC105275039                                                                        |
| 226 | LOC105275568 | 0.004204795 | probable pyruvate dehydrogenase E1 component subunit alpha                                          |
| 227 | LOC105285003 | 0.004266796 | uncharacterized LOC105285003                                                                        |
| 228 | LOC105276507 | 0.004334577 | notchless protein homolog 1                                                                         |
| 229 | LOC105275184 | 0.004373376 | SWI/SNF-related matrix-associated actin-dependent regulator of chromatin subfamily A-like protein 1 |
| 230 | LOC105276445 | 0.004373376 | la protein homolog                                                                                  |
| 231 | LOC105279818 | 0.004373376 | G2/mitotic-specific cyclin-B3                                                                       |
| 232 | LOC105281245 | 0.004373376 | uncharacterized LOC105281245                                                                        |
| 233 | LOC105285918 | 0.004373376 | probable kinetochore protein NUF2                                                                   |
| 234 | LOC105286949 | 0.004373376 | RNA-binding protein 4.1                                                                             |
| 235 | LOC105286220 | 0.004374269 | nuclear pore complex protein Nup133                                                                 |
| 236 | LOC105278869 | 0.00442564  | uncharacterized LOC105278869                                                                        |
| 237 | LOC105277651 | 0.004438611 | rap1 GTPase-activating protein 1                                                                    |
| 238 | LOC105286343 | 0.004658075 | putative serine protease K12H4.7                                                                    |
| 239 | LOC105283179 | 0.004746696 | carcinine transporter                                                                               |
| 240 | LOC105281685 | 0.004888436 | venom carboxylesterase-6                                                                            |
| 241 | LOC105280491 | 0.004955404 | inosine-5'-monophosphate dehydrogenase                                                              |
| 242 | LOC105277108 | 0.004990146 | uncharacterized LOC105277108                                                                        |
| 243 | LOC105277299 | 0.004990146 | ionotropic receptor 25a                                                                             |
| 244 | LOC105278142 | 0.00501094  | protein phosphatase methylesterase 1                                                                |
| 245 | LOC105282563 | 0.005136377 | general transcription factor IIH subunit 1                                                          |
| 246 | LOC105283753 | 0.005136377 | matrix metalloproteinase-2                                                                          |
| 247 | LOC105287183 | 0.005136377 | uncharacterized LOC105287183                                                                        |
| 248 | LOC105286143 | 0.005213679 | renin receptor                                                                                      |
| 249 | LOC105275836 | 0.005222883 | dexamethasone-induced Ras-related protein 1                                                         |
| 250 | LOC105279586 | 0.005250814 | uncharacterized LOC105279586                                                                        |
| 251 | LOC105284384 | 0.005250814 | protein stum                                                                                        |
| 252 | LOC105279197 | 0.005273064 | cyclin-dependent-like kinase 5                                                                      |
| 253 | LOC105277469 | 0.005407787 | tubulin beta chain                                                                                  |
| 254 | LOC105285464 | 0.0055311   | calmodulin-binding transcription activator 2                                                        |
| 255 | LOC105280121 | 0.00553732  | esterase E4                                                                                         |
| 256 | LOC105277435 | 0.005768748 | targeting protein for Xklp2                                                                         |
| 257 | LOC105277439 | 0.005787527 | ADP-ribosylation factor-like protein 6                                                              |
| 258 | LOC105279165 | 0.005861519 | LIM domain and actin-binding protein 1                                                              |
| 259 | LOC105287714 | 0.005943601 | protein hunchback                                                                                   |
| 260 | LOC105274872 | 0.006089499 | V-type proton ATPase subunit B                                                                      |
| 261 | LOC105275324 | 0.006089499 | angio-associated migratory cell protein                                                             |
| 262 | LOC105286103 | 0.006237383 | glutamate--cysteine ligase catalytic subunit                                                        |
| 263 | LOC105284633 | 0.006238679 | gliomedin                                                                                           |
| 264 | LOC105279018 | 0.006440394 | ras-related and estrogen-regulated growth inhibitor                                                 |
| 265 | LOC105276398 | 0.006458399 | beta-hexosaminidase subunit beta                                                                    |
| 266 | LOC105276421 | 0.006458399 | reticulon-4-interacting protein 1                                                                   |

|     |              |             |                                                                     |
|-----|--------------|-------------|---------------------------------------------------------------------|
| 267 | LOC105277488 | 0.006458399 | neuropeptide CCHamide-2 receptor-like                               |
| 268 | LOC105282470 | 0.006458399 | centromere protein L                                                |
| 269 | LOC105284938 | 0.006505284 | telomerase reverse transcriptase-like                               |
| 270 | LOC105281051 | 0.006549854 | protein FAM173B                                                     |
| 271 | LOC105279471 | 0.00663211  | uncharacterized LOC105279471                                        |
| 272 | LOC105281618 | 0.006925192 | uncharacterized LOC105281618                                        |
| 273 | LOC105284524 | 0.0069971   | hemocytin                                                           |
| 274 | LOC105280836 | 0.00727081  | uncharacterized LOC105280836                                        |
| 275 | LOC105274893 | 0.007357978 | uncharacterized LOC105274893                                        |
| 276 | LOC105286889 | 0.007357978 | uncharacterized LOC105286889                                        |
| 277 | LOC105274660 | 0.007463435 | uncharacterized LOC105274660                                        |
| 278 | LOC105274901 | 0.007463435 | SH3 domain-binding glutamic acid-rich protein homolog               |
| 279 | LOC105280103 | 0.007479243 | inositol-tetrakisphosphate 1-kinase                                 |
| 280 | LOC105277350 | 0.007511244 | uncharacterized LOC105277350                                        |
| 281 | LOC105284074 | 0.007705767 | phospholipase B1                                                    |
| 282 | LOC105285671 | 0.007705767 | nucleoporin Ndc1                                                    |
| 283 | LOC105283621 | 0.007727391 | synaptic vesicle glycoprotein 2C                                    |
| 284 | LOC105280985 | 0.007749383 | ATP-dependent RNA helicase SUV3 homolog                             |
| 285 | LOC105276851 | 0.007925953 | rho guanine nucleotide exchange factor 10-like protein              |
| 286 | LOC105277458 | 0.007925953 | DNA replication licensing factor MCM4                               |
| 287 | LOC105281382 | 0.007996421 | deoxynucleoside kinase                                              |
| 288 | LOC105279911 | 0.00811899  | sterol O-acyltransferase 1                                          |
| 289 | LOC105287024 | 0.008305523 | uncharacterized LOC105287024                                        |
| 290 | LOC105275955 | 0.008312762 | DNA topoisomerase 2-binding protein 1-A                             |
| 291 | LOC105278498 | 0.008312762 | neither inactivation nor afterpotential protein G                   |
| 292 | LOC105278931 | 0.008312762 | venom allergen 3                                                    |
| 293 | LOC105279816 | 0.008312762 | cAMP-specific 3'                                                    |
| 294 | LOC105285550 | 0.008312762 | heat shock 70 kDa protein cognate 4                                 |
| 295 | LOC105287679 | 0.008312762 | kinetochore protein NDC80 homolog                                   |
| 296 | LOC105276789 | 0.008448158 | putative methyltransferase NSUN6                                    |
| 297 | LOC105286365 | 0.008459175 | uncharacterized LOC105286365                                        |
| 298 | LOC105278774 | 0.008516871 | hydroxypyruvate reductase                                           |
| 299 | LOC105279012 | 0.008712235 | uncharacterized LOC105279012                                        |
| 300 | LOC105283008 | 0.008867065 | uncharacterized LOC105283008                                        |
| 301 | LOC105282359 | 0.008886148 | myosin regulatory light chain 2                                     |
| 302 | LOC105276807 | 0.009003188 | mitochondrial-processing peptidase subunit beta                     |
| 303 | LOC105286101 | 0.009100546 | uncharacterized LOC105286101                                        |
| 304 | LOC105286139 | 0.009113335 | translation elongation factor 2                                     |
| 305 | LOC105282872 | 0.009170765 | acylphosphatase-1                                                   |
| 306 | LOC105285256 | 0.009279029 | copper chaperone for superoxide dismutase                           |
| 307 | LOC105288172 | 0.009328315 | hepatocyte nuclear factor 6-like                                    |
| 308 | LOC105281757 | 0.00959872  | type I inositol 1                                                   |
| 309 | LOC105282576 | 0.01011098  | U3 small nucleolar RNA-interacting protein 2                        |
| 310 | LOC105285936 | 0.010130592 | glutathione S-transferase 1-1                                       |
| 311 | LOC105281321 | 0.010183213 | 5-phosphohydroxy-L-lysine phospho-lyase                             |
| 312 | LOC105284488 | 0.010203996 | meiosis arrest female protein 1 homolog                             |
| 313 | LOC105277205 | 0.010456356 | aquaporin-12A                                                       |
| 314 | LOC105278655 | 0.010905246 | ATP synthase lipid-binding protein                                  |
| 315 | LOC105284448 | 0.010964398 | uncharacterized LOC105284448                                        |
| 316 | LOC105281030 | 0.010989901 | uncharacterized LOC105281030                                        |
| 317 | LOC105284205 | 0.011084639 | nucleolar GTP-binding protein 1                                     |
| 318 | LOC105280772 | 0.011298076 | uncharacterized LOC105280772                                        |
| 319 | LOC105282573 | 0.011350785 | SH2B adapter protein 1                                              |
| 320 | LOC105279271 | 0.011467688 | uncharacterized LOC105279271                                        |
| 321 | LOC105283206 | 0.011714415 | THAP domain-containing protein 5-like                               |
| 322 | LOC105276279 | 0.011796248 | dynein regulatory complex protein 1                                 |
| 323 | LOC105283005 | 0.012137093 | protein lethal(2)essential for life                                 |
| 324 | LOC105277437 | 0.013010433 | protein LTV1 homolog                                                |
| 325 | LOC105283737 | 0.013047134 | myosin heavy chain                                                  |
| 326 | LOC105288114 | 0.013047134 | replication factor C subunit 4                                      |
| 327 | LOC105277654 | 0.013069808 | uncharacterized LOC105277654                                        |
| 328 | LOC105275475 | 0.013180822 | bifunctional methylenetetrahydrofolate dehydrogenase/cyclohydrolase |
| 329 | LOC105283200 | 0.013180822 | embryonic polarity protein dorsal                                   |
| 330 | LOC105275339 | 0.01329855  | H/ACA ribonucleoprotein complex subunit 4                           |
| 331 | LOC105277860 | 0.013408944 | monocarboxylate transporter 12                                      |
| 332 | LOC105277685 | 0.013431626 | solute carrier family 12 member 4                                   |
| 333 | LOC105286216 | 0.01354877  | kinesin-like protein KIF23                                          |

|     |              |             |                                                               |
|-----|--------------|-------------|---------------------------------------------------------------|
| 334 | LOC105284533 | 0.013556775 | RISC-loading complex subunit tarbp2                           |
| 335 | LOC105276678 | 0.013571358 | transferrin                                                   |
| 336 | LOC105281010 | 0.013571358 | uncharacterized LOC105281010                                  |
| 337 | LOC105282771 | 0.013571358 | exosome complex component RRP40                               |
| 338 | LOC105276745 | 0.013910074 | pre-rRNA processing protein FTSJ3                             |
| 339 | LOC105281448 | 0.013910074 | twitchin                                                      |
| 340 | LOC105274926 | 0.014081898 | RNA-binding protein 34                                        |
| 341 | LOC105277818 | 0.014081898 | uncharacterized LOC105277818                                  |
| 342 | LOC105275821 | 0.014102391 | dnaJ homolog subfamily C member 22                            |
| 343 | LOC105286289 | 0.014120423 | upstream stimulatory factor 2                                 |
| 344 | LOC105282390 | 0.01455199  | single-strand selective monofunctional uracil DNA glycosylase |
| 345 | LOC105288106 | 0.01455199  | sarcosine dehydrogenase                                       |
| 346 | LOC105281668 | 0.014858442 | E3 ubiquitin-protein ligase RFWD2-like                        |
| 347 | LOC105277939 | 0.015013487 | uncharacterized LOC105277939                                  |
| 348 | LOC105283516 | 0.015070799 | dual oxidase 2                                                |
| 349 | LOC105283205 | 0.015279418 | ATP-dependent RNA helicase Ddx1                               |
| 350 | LOC105282422 | 0.016180145 | cuticle protein 64                                            |
| 351 | LOC105274940 | 0.016450608 | homeobox protein prospero                                     |
| 352 | LOC105279513 | 0.016450608 | tRNA dimethylallyltransferase                                 |
| 353 | LOC105280398 | 0.016525208 | protein will die slowly                                       |
| 354 | LOC105279732 | 0.016535081 | chymotrypsin-like elastase family member 2A                   |
| 355 | LOC105287010 | 0.016601834 | uncharacterized LOC105287010                                  |
| 356 | LOC105283803 | 0.016726746 | ATP synthase subunit O                                        |
| 357 | LOC105278140 | 0.016770953 | BTB/POZ domain-containing protein KCTD16                      |
| 358 | LOC105280581 | 0.016868053 | coiled-coil domain-containing protein 50                      |
| 359 | LOC105281377 | 0.016956368 | uncharacterized LOC105281377                                  |
| 360 | LOC105278656 | 0.017140571 | solute carrier family 25 member 40                            |
| 361 | LOC105278757 | 0.017140571 | uncharacterized LOC105278757                                  |
| 362 | LOC105287066 | 0.017519339 | DNA ligase 1                                                  |
| 363 | LOC105287949 | 0.017530134 | protein LLP homolog                                           |
| 364 | LOC105283796 | 0.017845437 | ornithine decarboxylase 2-like                                |
| 365 | LOC105278078 | 0.017864174 | uncharacterized LOC105278078                                  |
| 366 | LOC105287636 | 0.017896942 | uncharacterized LOC105287636                                  |
| 367 | LOC105278194 | 0.0180767   | prolyl 3-hydroxylase OGFOD1                                   |
| 368 | LOC105285921 | 0.018086746 | uncharacterized LOC105285921                                  |
| 369 | LOC105282866 | 0.018105674 | myb-binding protein 1A                                        |
| 370 | LOC105275582 | 0.018212091 | zinc finger protein 275                                       |
| 371 | LOC105280537 | 0.018304925 | uncharacterized LOC105280537                                  |
| 372 | LOC105275811 | 0.01861386  | ribosome biogenesis protein BOP1 homolog                      |
| 373 | LOC105280125 | 0.01861386  | uncharacterized LOC105280125                                  |
| 374 | LOC105281082 | 0.01861386  | uncharacterized LOC105281082                                  |
| 375 | LOC105286381 | 0.018645702 | uncharacterized LOC105286381                                  |
| 376 | LOC105277441 | 0.018874679 | mucin-2                                                       |
| 377 | LOC105283628 | 0.018918359 | uncharacterized LOC105283628                                  |
| 378 | LOC105280004 | 0.019061425 | dynein assembly factor 3                                      |
| 379 | LOC105284779 | 0.019110966 | uncharacterized LOC105284779                                  |
| 380 | LOC105280988 | 0.019550262 | ejaculatory bulb-specific protein 3                           |
| 381 | LOC105284119 | 0.019585838 | ribonuclease H-like                                           |
| 382 | LOC105280397 | 0.019846382 | DNA-dependent protein kinase catalytic subunit                |
| 383 | LOC105282816 | 0.020174174 | uncharacterized LOC105282816                                  |
| 384 | LOC105276699 | 0.020382878 | uncharacterized LOC105276699                                  |
| 385 | LOC105285953 | 0.020382878 | uncharacterized LOC105285953                                  |
| 386 | LOC105275455 | 0.020403346 | ankyrin repeat and LEM domain-containing protein 2            |
| 387 | LOC105277915 | 0.020403346 | probable ATP-dependent RNA helicase DDX17                     |
| 388 | LOC105280774 | 0.020403346 | rho guanine nucleotide exchange factor 3                      |
| 389 | LOC105283366 | 0.020403346 | uncharacterized LOC105283366                                  |
| 390 | LOC105285712 | 0.020403346 | tolloid-like protein 2                                        |
| 391 | LOC105286720 | 0.020403346 | nucleolar protein 56                                          |
| 392 | LOC105282918 | 0.020409442 | putative fatty acyl-CoA reductase CG5065                      |
| 393 | LOC105287587 | 0.020806822 | uncharacterized LOC105287587                                  |
| 394 | LOC105274629 | 0.020916032 | uncharacterized LOC105274629                                  |
| 395 | LOC105282320 | 0.020916032 | hemicentin-2                                                  |
| 396 | LOC105276546 | 0.020954818 | uncharacterized LOC105276546                                  |
| 397 | LOC105275970 | 0.02108041  | uncharacterized LOC105275970                                  |
| 398 | LOC105284165 | 0.021328675 | protein THEM6                                                 |
| 399 | LOC105285353 | 0.021510104 | uncharacterized LOC105285353                                  |
| 400 | LOC105281103 | 0.021841118 | pancreatic triacylglycerol lipase-like                        |

|     |              |             |                                                                            |
|-----|--------------|-------------|----------------------------------------------------------------------------|
| 401 | LOC105277131 | 0.022127761 | uncharacterized LOC105277131                                               |
| 402 | LOC105287812 | 0.022255454 | uncharacterized LOC105287812                                               |
| 403 | LOC105284497 | 0.02226819  | intraflagellar transport protein 46 homolog                                |
| 404 | LOC105285007 | 0.022298915 | uncharacterized LOC105285007                                               |
| 405 | LOC105277337 | 0.022352653 | tubulin polyglutamylase TTL4                                               |
| 406 | LOC105283527 | 0.023808013 | uncharacterized LOC105283527                                               |
| 407 | LOC105285553 | 0.023808013 | uncharacterized LOC105285553                                               |
| 408 | LOC105287684 | 0.023842556 | uncharacterized LOC105287684                                               |
| 409 | LOC105287283 | 0.023980629 | nucleoplasmin-like protein                                                 |
| 410 | LOC105277137 | 0.024077995 | protein lethal(2)essential for life                                        |
| 411 | LOC105283368 | 0.024691043 | probable ATP-dependent RNA helicase CG8611                                 |
| 412 | LOC105284077 | 0.024988634 | juvenile hormone epoxide hydrolase 1-like                                  |
| 413 | LOC105279278 | 0.025129854 | lysosomal thioesterase PPT2 homolog                                        |
| 414 | LOC105282179 | 0.025129854 | NADH dehydrogenase [ubiquinone] 1 beta subcomplex subunit 2                |
| 415 | LOC105286407 | 0.025129854 | titin                                                                      |
| 416 | LOC105284466 | 0.025211033 | NADH dehydrogenase [ubiquinone] 1 alpha subcomplex subunit 10              |
| 417 | LOC105274997 | 0.025259326 | rRNA methyltransferase 2                                                   |
| 418 | LOC105284252 | 0.025766983 | uncharacterized LOC105284252                                               |
| 419 | LOC105280202 | 0.026009546 | glycine-rich cell wall structural protein                                  |
| 420 | LOC105276085 | 0.026393569 | uncharacterized LOC105276085                                               |
| 421 | LOC105284185 | 0.026393569 | probable RNA-binding protein EIF1AD                                        |
| 422 | LOC105285503 | 0.026393569 | protein tyrosine phosphatase domain-containing protein 1                   |
| 423 | LOC105281711 | 0.026450157 | serine/threonine-protein phosphatase PP1-beta catalytic subunit            |
| 424 | LOC105282531 | 0.026901222 | mitochondrial pyruvate carrier 2                                           |
| 425 | LOC105287273 | 0.026984143 | E3 ubiquitin-protein ligase rnf8-A                                         |
| 426 | LOC105276433 | 0.02717383  | box A-binding factor                                                       |
| 427 | LOC105276873 | 0.02717383  | protein tipE                                                               |
| 428 | LOC105281449 | 0.02717383  | muscle M-line assembly protein unc-89-like                                 |
| 429 | LOC105284115 | 0.027407734 | uncharacterized LOC105284115                                               |
| 430 | LOC105276534 | 0.027511855 | uncharacterized LOC105276534                                               |
| 431 | LOC105282149 | 0.027531068 | guanine nucleotide-binding protein subunit beta-5                          |
| 432 | LOC105285652 | 0.027531068 | proton-coupled amino acid transporter-like protein CG1139                  |
| 433 | LOC105287285 | 0.027531068 | zinc transporter ZIP13 homolog                                             |
| 434 | LOC105280369 | 0.02784133  | uncharacterized LOC105280369                                               |
| 435 | LOC105281610 | 0.027939891 | origin recognition complex subunit 1                                       |
| 436 | LOC105285829 | 0.028011009 | guanine nucleotide-binding protein-like 3 homolog                          |
| 437 | LOC105286156 | 0.028011009 | gamma-aminobutyric acid receptor subunit beta-like                         |
| 438 | LOC105285775 | 0.028055328 | uncharacterized LOC105285775                                               |
| 439 | LOC105282104 | 0.028088617 | glutamate decarboxylase                                                    |
| 440 | LOC105277525 | 0.028172885 | uncharacterized LOC105277525                                               |
| 441 | LOC105286769 | 0.028172885 | uncharacterized LOC105286769                                               |
| 442 | LOC105278343 | 0.028273197 | serine/threonine-protein phosphatase 6 regulatory ankyrin repeat subunit A |
| 443 | LOC105284789 | 0.028448938 | uncharacterized LOC105284789                                               |
| 444 | LOC105287552 | 0.028448938 | protein snakeskin                                                          |
| 445 | LOC105275954 | 0.028521019 | cytochrome P450 6B7-like                                                   |
| 446 | LOC105281037 | 0.029105349 | microtubule-associated protein futsch                                      |
| 447 | LOC105279447 | 0.029260078 | poly(ADP-ribose) glycohydrolase ARH3                                       |
| 448 | LOC105284794 | 0.029260078 | uncharacterized LOC105284794                                               |
| 449 | LOC105284925 | 0.029260078 | chloride channel protein 2                                                 |
| 450 | LOC105276504 | 0.029409338 | calcineurin subunit B type 2                                               |
| 451 | LOC105278482 | 0.029581681 | E3 ubiquitin-protein ligase TRAIIP                                         |
| 452 | LOC105278101 | 0.030503559 | CCA tRNA nucleotidyltransferase 1                                          |
| 453 | LOC105275507 | 0.03071899  | PDZ and LIM domain protein 3                                               |
| 454 | LOC105279588 | 0.030725831 | activating signal cointegrator 1 complex subunit 3                         |
| 455 | LOC105286287 | 0.031079663 | uncharacterized LOC105286287                                               |
| 456 | LOC105288201 | 0.031079663 | uncharacterized LOC105288201                                               |
| 457 | LOC105284128 | 0.031224018 | sialin                                                                     |
| 458 | LOC105279871 | 0.031406262 | oxysterol-binding protein-related protein 2                                |
| 459 | LOC105278676 | 0.031605854 | uncharacterized LOC105278676                                               |
| 460 | LOC105275286 | 0.031779213 | innexin inx3                                                               |
| 461 | LOC105279699 | 0.03198123  | prilkin-39-like                                                            |
| 462 | LOC105278724 | 0.032342333 | fatty acid synthase-like                                                   |
| 463 | LOC105278934 | 0.032342333 | exonuclease 3'-5' domain-containing protein 2                              |
| 464 | LOC105285644 | 0.032342333 | rootletin                                                                  |
| 465 | LOC105287695 | 0.032342333 | serine/threonine-protein kinase polo                                       |
| 466 | LOC105278009 | 0.032494456 | diuretic hormone 44                                                        |
| 467 | LOC105281176 | 0.032494456 | uncharacterized LOC105281176                                               |

|     |              |             |                                                              |
|-----|--------------|-------------|--------------------------------------------------------------|
| 468 | LOC105287539 | 0.032494456 | protein vein                                                 |
| 469 | LOC105286140 | 0.032710688 | zinc finger protein 474                                      |
| 470 | LOC105288078 | 0.032728271 | WD repeat-containing protein 43                              |
| 471 | LOC105278695 | 0.033077184 | filamin-A                                                    |
| 472 | LOC105282856 | 0.033177527 | N-acetyltransferase ESCO2                                    |
| 473 | LOC105285465 | 0.033323481 | AP-2 complex subunit mu                                      |
| 474 | LOC105275769 | 0.033494647 | uncharacterized LOC105275769                                 |
| 475 | LOC105274965 | 0.0335862   | cyclin-dependent kinase-like 4                               |
| 476 | LOC105279598 | 0.0335862   | glutamate dehydrogenase                                      |
| 477 | LOC105276193 | 0.034334734 | uncharacterized LOC105276193                                 |
| 478 | LOC105277743 | 0.034334734 | trimethylguanosine synthase                                  |
| 479 | LOC105287116 | 0.034334734 | la-related protein 7                                         |
| 480 | LOC105281786 | 0.034343523 | hyaluronan mediated motility receptor                        |
| 481 | LOC105285243 | 0.034343523 | lysozyme                                                     |
| 482 | LOC105277206 | 0.034521091 | sodium- and chloride-dependent GABA transporter ine          |
| 483 | LOC105285400 | 0.034714853 | gem-associated protein 5                                     |
| 484 | LOC105287758 | 0.034740117 | uncharacterized LOC105287758                                 |
| 485 | LOC105286522 | 0.034969332 | alkylglycerol monooxygenase-like                             |
| 486 | LOC105279786 | 0.035783651 | 1-acyl-sn-glycerol-3-phosphate acyltransferase gamma         |
| 487 | LOC105282695 | 0.035783651 | surfeit locus protein 1                                      |
| 488 | LOC105282710 | 0.035783651 | protein penguin                                              |
| 489 | LOC105283615 | 0.035783651 | serine protease nudel                                        |
| 490 | LOC105284985 | 0.035783651 | putative uncharacterized protein DDB_G0271606                |
| 491 | LOC105277279 | 0.035909715 | probable citrate synthase 2                                  |
| 492 | LOC105282173 | 0.036134281 | homeotic protein ultrabithorax                               |
| 493 | LOC105283611 | 0.036243182 | allatostatin A                                               |
| 494 | LOC105277912 | 0.036320028 | translation initiation factor eIF-2B subunit epsilon         |
| 495 | LOC105281216 | 0.036320028 | F-box only protein 21                                        |
| 496 | LOC105285869 | 0.036539819 | ubiquitin-conjugating enzyme E2 H                            |
| 497 | LOC105287550 | 0.036680683 | serine/arginine repetitive matrix protein 1                  |
| 498 | LOC105280031 | 0.036693551 | ankyrin repeat                                               |
| 499 | LOC105280990 | 0.036693551 | nanos homolog 3                                              |
| 500 | LOC105281197 | 0.036849698 | uncharacterized LOC105281197                                 |
| 501 | LOC105277728 | 0.036980806 | uncharacterized LOC105277728                                 |
| 502 | LOC105279536 | 0.036980806 | uncharacterized LOC105279536                                 |
| 503 | LOC105286284 | 0.036980806 | uncharacterized LOC105286284                                 |
| 504 | LOC105274442 | 0.03720635  | selenide                                                     |
| 505 | LOC105277683 | 0.03720635  | bromodomain-containing protein 7                             |
| 506 | LOC105278758 | 0.03720635  | actin                                                        |
| 507 | LOC105284134 | 0.03720635  | uncharacterized LOC105284134                                 |
| 508 | LOC105279916 | 0.037236442 | major facilitator superfamily domain-containing protein 6-A  |
| 509 | LOC105280171 | 0.037236442 | uncharacterized LOC105280171                                 |
| 510 | LOC105284746 | 0.037236442 | negative elongation factor B                                 |
| 511 | LOC105275435 | 0.03744624  | alpha-(1                                                     |
| 512 | LOC105284181 | 0.037636133 | peptidyl-prolyl cis-trans isomerase D                        |
| 513 | LOC105275321 | 0.037869617 | adenosylhomocysteinase                                       |
| 514 | LOC105275517 | 0.03796665  | probable tubulin polyglutamylase TTL2                        |
| 515 | LOC105286503 | 0.03796665  | decaprenyl-diphosphate synthase subunit 2                    |
| 516 | LOC105287422 | 0.037977018 | probable cation-transporting ATPase 13A3                     |
| 517 | LOC105275301 | 0.038090542 | uncharacterized protein CG3556                               |
| 518 | LOC105276468 | 0.038090542 | uncharacterized LOC105276468                                 |
| 519 | LOC105277551 | 0.038090542 | glycine N-methyltransferase                                  |
| 520 | LOC105278540 | 0.038090542 | dipeptidase 1                                                |
| 521 | LOC105279249 | 0.038090542 | ran GTPase-activating protein 1                              |
| 522 | LOC105281707 | 0.038090542 | uncharacterized LOC105281707                                 |
| 523 | LOC105285645 | 0.038090542 | uncharacterized LOC105285645                                 |
| 524 | LOC105287548 | 0.038090542 | uncharacterized LOC105287548                                 |
| 525 | LOC105287790 | 0.038090542 | uncharacterized LOC105287790                                 |
| 526 | LOC105282864 | 0.038322843 | uncharacterized LOC105282864                                 |
| 527 | LOC105282376 | 0.039194352 | RNA-binding protein 7                                        |
| 528 | LOC105281784 | 0.039200302 | transcription termination factor 2                           |
| 529 | LOC105284141 | 0.039200302 | speckle-type POZ protein B                                   |
| 530 | LOC105285823 | 0.039606123 | elongation of very long chain fatty acids protein AAEL008004 |
| 531 | LOC105284850 | 0.039943123 | AP-3 complex subunit sigma-1                                 |
| 532 | LOC105276858 | 0.040006352 | transcription factor SPT20 homolog                           |
| 533 | LOC105279064 | 0.040006352 | uncharacterized LOC105279064                                 |
| 534 | LOC105285186 | 0.040140578 | structural maintenance of chromosomes protein 6              |



|     |              |             |                                                             |
|-----|--------------|-------------|-------------------------------------------------------------|
| 535 | LOC105287357 | 0.040200326 | uncharacterized LOC105287357                                |
| 536 | LOC105274498 | 0.040851277 | sodium- and chloride-dependent GABA transporter 1           |
| 537 | LOC105276159 | 0.040851277 | uncharacterized protein MAL13P1.304                         |
| 538 | LOC105287783 | 0.040851277 | sodium channel protein Nach                                 |
| 539 | LOC105275608 | 0.041004647 | uncharacterized LOC105275608                                |
| 540 | LOC105276234 | 0.041004647 | phospholipid phosphatase 6                                  |
| 541 | LOC105279933 | 0.041004647 | leucine-rich repeat-containing G-protein coupled receptor 4 |
| 542 | LOC105285453 | 0.041434562 | kinectin                                                    |
| 543 | LOC105280382 | 0.042129344 | major facilitator superfamily domain-containing protein 6   |
| 544 | LOC105283491 | 0.042246189 | endoribonuclease Dcr-1                                      |
| 545 | LOC105281288 | 0.042424317 | RNA-binding protein squid                                   |
| 546 | LOC105282239 | 0.042484526 | uncharacterized LOC105282239                                |
| 547 | LOC105281920 | 0.042763701 |                                                             |
| 548 | LOC105287196 | 0.042763701 | leucine-rich repeat protein 1                               |
| 549 | LOC105277627 | 0.042854837 | nucleolar protein 14 homolog                                |
| 550 | LOC105281729 | 0.042921014 | uncharacterized LOC105281729                                |
| 551 | LOC105277339 | 0.043338805 | vicilin-like seed storage protein At2g18540                 |
| 552 | LOC105277777 | 0.043338805 | pseudouridylylase synthase 7 homolog                        |
| 553 | LOC105279952 | 0.043338805 | uncharacterized LOC105279952                                |
| 554 | LOC105274595 | 0.043528611 | chromobox protein homolog 3                                 |
| 555 | LOC105278868 | 0.043615876 | uncharacterized LOC105278868                                |
| 556 | LOC105279367 | 0.0436181   | lipid storage droplets surface-binding protein 2            |
| 557 | LOC105274633 | 0.043830814 | ejaculatory bulb-specific protein 3                         |
| 558 | LOC105279164 | 0.043830814 | uncharacterized LOC105279164                                |
| 559 | LOC105285169 | 0.043830814 | sperm flagellar protein 2                                   |
| 560 | LOC105287016 | 0.043833302 | adenylate kinase isoenzyme 5                                |
| 561 | LOC105278924 | 0.044449161 | uncharacterized LOC105278924                                |
| 562 | LOC105275563 | 0.044542688 | uncharacterized LOC105275563                                |
| 563 | LOC105281601 | 0.044542688 | eukaryotic translation initiation factor 4E-1A              |
| 564 | LOC105287573 | 0.044542688 | E3 ubiquitin-protein ligase RAD18                           |
| 565 | LOC105279259 | 0.044734305 | ATP synthase subunit e                                      |
| 566 | LOC105280130 | 0.044903873 | uncharacterized LOC105280130                                |
| 567 | LOC105287080 | 0.044903873 | uncharacterized LOC105287080                                |
| 568 | LOC105278713 | 0.044938377 | LIM domain kinase 1                                         |
| 569 | LOC105287888 | 0.045429367 | uncharacterized LOC105287888                                |
| 570 | LOC105275551 | 0.045614788 | uncharacterized LOC105275551                                |
| 571 | LOC105275867 | 0.045614788 | uncharacterized LOC105275867                                |
| 572 | LOC105276573 | 0.045614788 | leucine-rich repeat neuronal protein 2                      |
| 573 | LOC105278750 | 0.045614788 | cell adhesion molecule 2                                    |
| 574 | LOC105280293 | 0.045614788 | pro-corazonin                                               |
| 575 | LOC105284209 | 0.045614788 | lysophospholipid acyltransferase 7                          |
| 576 | LOC105287733 | 0.045614788 | DNA demethylase ALKBH1                                      |
| 577 | LOC105287809 | 0.045614788 | uncharacterized LOC105287809                                |
| 578 | LOC105277277 | 0.045746641 | cytochrome P450 9e2                                         |
| 579 | LOC105274835 | 0.045759955 | uncharacterized LOC105274835                                |
| 580 | LOC105281338 | 0.045759955 | zinc finger protein 800                                     |
| 581 | LOC105288116 | 0.045759955 | uncharacterized LOC105288116                                |
| 582 | LOC105280261 | 0.04596819  | uncharacterized LOC105280261                                |
| 583 | LOC105277096 | 0.045989542 | lysosomal Pro-X carboxypeptidase                            |
| 584 | LOC105281290 | 0.046006084 | late secretory pathway protein AVL9 homolog                 |
| 585 | LOC105288118 | 0.046887354 | stress-associated endoplasmic reticulum protein 2           |
| 586 | LOC105284513 | 0.047266765 | putative E3 ubiquitin-protein ligase UBR7                   |
| 587 | LOC105282762 | 0.047379082 | L-lactate dehydrogenase-like                                |
| 588 | LOC105282263 | 0.048000578 | uncharacterized LOC105282263                                |
| 589 | LOC105276691 | 0.048240962 | E3 ubiquitin-protein ligase RNF14                           |
| 590 | LOC105285279 | 0.048240962 | tachykinins                                                 |
| 591 | LOC105284709 | 0.048566923 | uncharacterized LOC105284709                                |
| 592 | LOC105276523 | 0.048582277 | acetyl-coenzyme A synthetase                                |
| 593 | LOC105287556 | 0.048940312 | longitudinals lacking protein                               |
| 594 | LOC105280565 | 0.049387746 | DNA-directed RNA polymerases I and III subunit RPAC1        |
| 595 | LOC105281982 | 0.04942483  | cytochrome c oxidase assembly factor 3                      |
| 596 | LOC105287317 | 0.049864337 | actin                                                       |
