# Supplementary material for: Clonal raider ant brain transcriptomics identifies candidate molecular mechanisms for reproductive division of labor
Source: PubMed Central journal article supplement (PMC6090591; doi:10.1186/s12915-018-0558-8), 2018-08-13
Supplement: 12915_2018_558_MOESM5_ESM.pdf [file 12915_2018_558_MOESM5_ESM.pdf]

Summary of clusters enriched for DEGs.

| Time interval              | Number of genes in clusters (enriched for DEGs) with maximal change in expression for each time interval | Proportion of genes in clusters (enriched for DEGs) with maximal change in expression for each time interval (%) | Number of DEGs in clusters (enriched for DEGs) with maximal change in expression for each time interval | Proportion of DEGs in clusters (enriched for DEGs) with maximal change in expression for each time interval (%) | Ovary score |
|----------------------------|----------------------------------------------------------------------------------------------------------|------------------------------------------------------------------------------------------------------------------|---------------------------------------------------------------------------------------------------------|-----------------------------------------------------------------------------------------------------------------|-------------|
| Reproduction to brood care |                                                                                                          |                                                                                                                  |                                                                                                         |                                                                                                                 |             |
| 0-12 hrs                   | 502                                                                                                      | 28.5                                                                                                             | 85                                                                                                      | 22.5                                                                                                            | 3.4         |
| 12-24 hrs                  | 449                                                                                                      | 25.5                                                                                                             | 124                                                                                                     | 32.9                                                                                                            | 3.15        |
| 24-48 hrs                  | 313                                                                                                      | 17.7                                                                                                             | 75                                                                                                      | 19.9                                                                                                            | 1.95        |
| 48-96 hrs                  | 500                                                                                                      | 28.3                                                                                                             | 93                                                                                                      | 24.7                                                                                                            | 1.7         |
| Brood care to reproduction |                                                                                                          |                                                                                                                  |                                                                                                         |                                                                                                                 |             |
| 0-12 hrs                   | 167                                                                                                      | 10.2                                                                                                             | 19                                                                                                      | 8.3                                                                                                             | 1.3         |
| 12-24 hrs                  | 55                                                                                                       | 3.4                                                                                                              | 8                                                                                                       | 3.5                                                                                                             | 1.25        |
| 24-48 hrs                  | 0                                                                                                        | 0                                                                                                                | 0                                                                                                       | 0                                                                                                               | 1.75        |
| 48-96 hrs                  | 1408                                                                                                     | 86.4                                                                                                             | 203                                                                                                     | 88.3                                                                                                            | 2.95        |
