# Supplementary material for: Clonal raider ant brain transcriptomics identifies candidate molecular mechanisms for reproductive division of labor
Source: PubMed Central journal article supplement (PMC6090591; doi:10.1186/s12915-018-0558-8), 2018-08-13
Supplement: 12915_2018_558_MOESM7_ESM.pdf [file 12915_2018_558_MOESM7_ESM.pdf]

**RB**

GO:0005615 [CL] 'extracellular space'  
GO:0005789 [CL] 'endoplasmic reticulum membrane'  
GO:0005834 [CL] 'heterotrimeric G-protein complex'  
GO:0008237 [MF] 'metallopeptidase activity'  
GO:0015986 [BP] 'ATP synthesis coupled proton transport'  
GO:0035176 [BP] 'social behavior'  
GO:0035556 [BP] 'intracellular signal transduction'  
GO:0043565 [MF] 'sequence-specific DNA binding'  
GO:0046034 [BP] 'ATP metabolic process'  
GO:0046933 [MF] 'proton-transporting ATP synthase activity, rotational mechanism'  
GO:0055114 [BP] 'oxidation-reduction process'

GO:0005576 [CL] 'extracellular region'  
GO:0052689 [MF] 'carboxylic ester hydrolase activity'

GO:0016705 [MF] 'oxidoreductase activity, acting on paired donors, with incorporation or reduction of molecular oxygen'

**BR**

GO:0003824 [MF] 'catalytic activity'  
GO:0004252 [MF] 'serine-type endopeptidase activity'  
GO:0005216 [MF] 'ion channel activity'  
GO:0005319 [MF] 'lipid transporter activity'  
GO:0005506 [MF] 'iron ion binding'  
GO:0006030 [BP] 'chitin metabolic process'  
GO:0006508 [BP] 'proteolysis'  
GO:0006811 [BP] 'ion transport'  
GO:0006869 [BP] 'lipid transport'  
GO:0007160 [BP] 'cell-matrix adhesion'  
GO:0008061 [MF] 'chitin binding'  
GO:0009166 [BP] 'nucleotide catabolic process'  
GO:0016787 [MF] 'hydrolase activity'  
GO:0020037 [MF] 'heme binding'  
GO:0043169 [MF] 'cation binding'
