# Supplementary material for: Clonal raider ant brain transcriptomics identifies candidate molecular mechanisms for reproductive division of labor
Source: PubMed Central journal article supplement (PMC6090591; doi:10.1186/s12915-018-0558-8), 2018-08-13
Supplement: 12915_2018_558_MOESM8_ESM.pdf [file 12915_2018_558_MOESM8_ESM.pdf]

Proportion of edges linking clusters between transitions

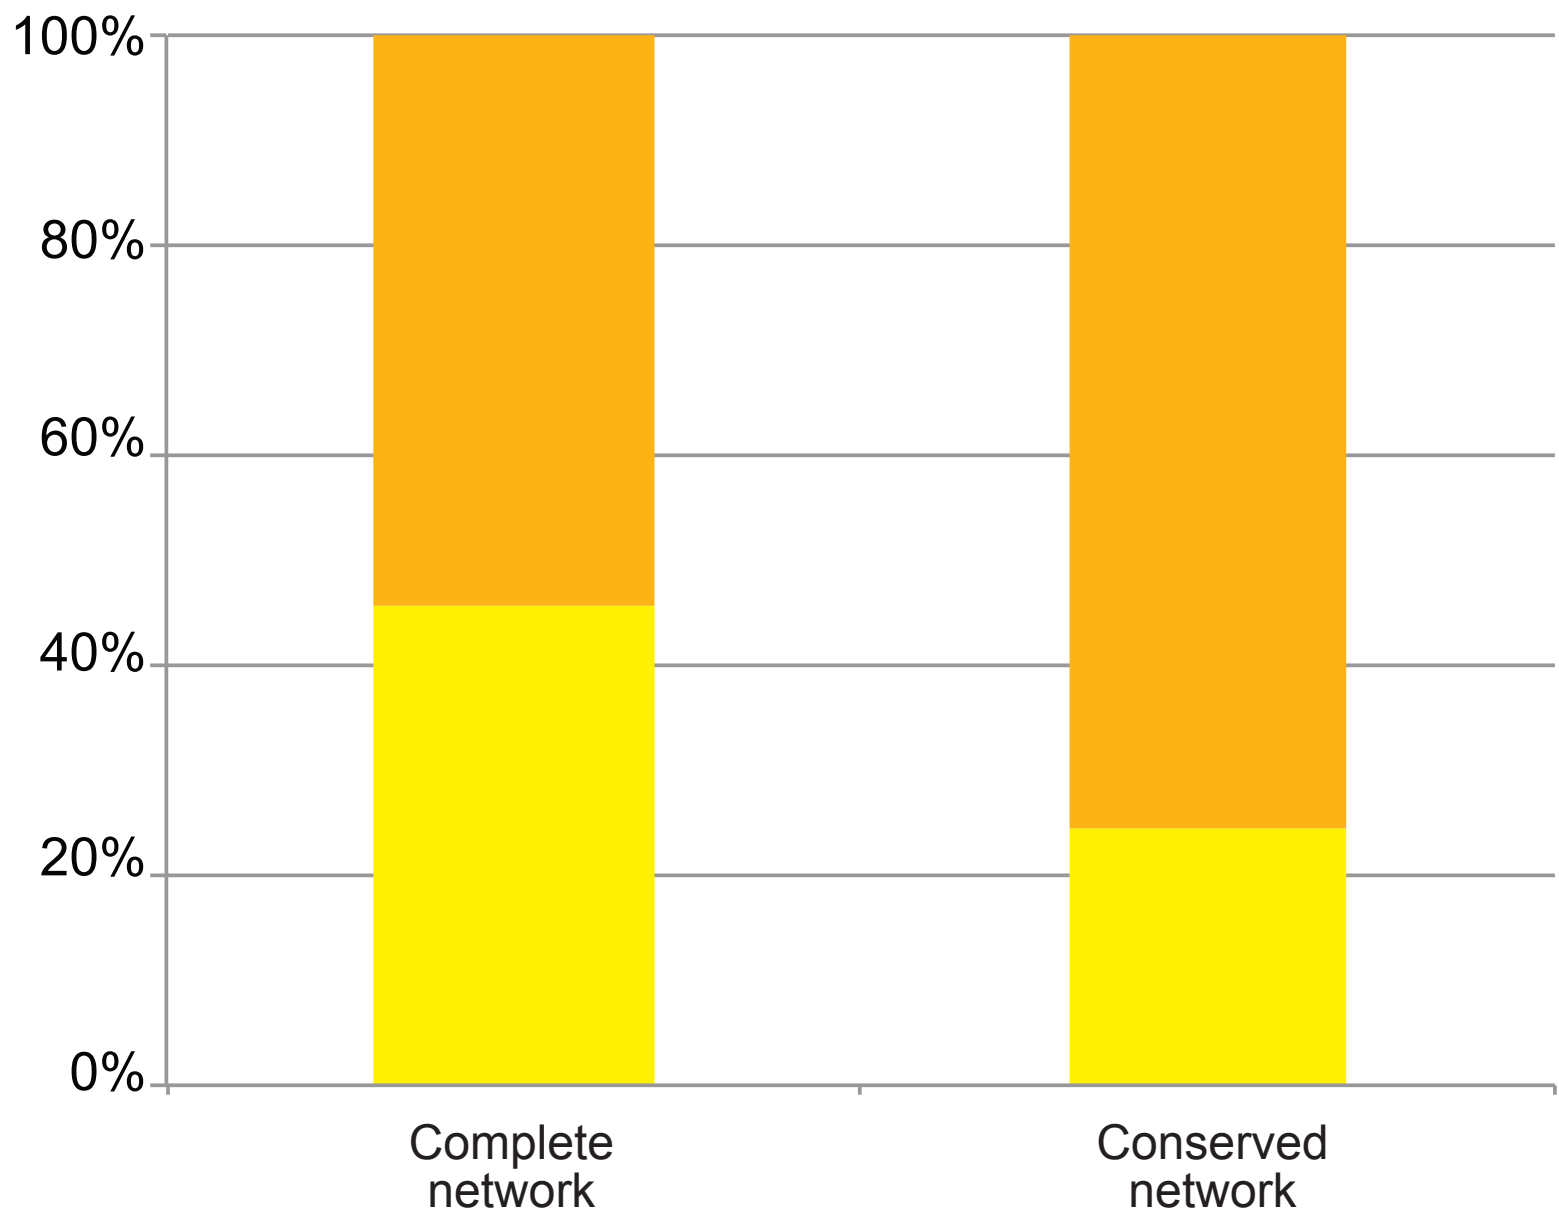

Edges linking clusters of genes regulated in:

- Same direction
- Opposite direction
