# Supplementary material for: Clonal raider ant brain transcriptomics identifies candidate molecular mechanisms for reproductive division of labor
Source: PubMed Central journal article supplement (PMC6090591; doi:10.1186/s12915-018-0558-8), 2018-08-13
Supplement: 12915_2018_558_MOESM9_ESM.pdf [file 12915_2018_558_MOESM9_ESM.pdf]

Top 40 DEGs (highest log2 fold change in expression)

| Reproduction to brood care |                |              |                                                             | Brood care to reproduction |                                                              |                |                                                             |
|----------------------------|----------------|--------------|-------------------------------------------------------------|----------------------------|--------------------------------------------------------------|----------------|-------------------------------------------------------------|
| 0-96 hours                 |                | 0-12 hours   |                                                             | 0-96 hours                 |                                                              | 0-12 hours     |                                                             |
| Gene                       | Annotation     | Gene         | Annotation                                                  | Gene                       | Annotation                                                   | Gene           | Annotation                                                  |
| 1                          | LOC105286381   | LOC105285921 | uncharacterized LOC105285921                                | LOC105281428_Q             | queen Vg                                                     | LOC105287093   | uncharacterized LOC105287093                                |
| 2                          | LOC105285921   | LOC105286381 | uncharacterized LOC105286381                                | LOC105277525               | uncharacterized LOC105277525                                 | LOC105276678   | transferrin                                                 |
| 3                          | LOC105285920   | LOC105276678 | transferrin                                                 | LOC105279933               | leucine-rich repeat-containing G-protein coupled receptor 4  | LOC105278524   | LIRP - ILP2                                                 |
| 4                          | LOC105275344   | LOC105285923 | elongation of very long chain fatty acids protein           | LOC105277435               | targeting protein for Xklp2                                  | LOC105278931   | venom allergen 3                                            |
| 5                          | LOC105276678   | LOC105278724 | fatty acid synthase                                         | LOC105287193               | uncharacterized LOC105287193                                 | LOC105277716   | facilitated trehalose transporter Tret1                     |
| 6                          | LOC105281428_Q | LOC105275344 | csp8                                                        | LOC105281920               | aminopeptidase N-like                                        | LOC105282359   | myosin regulatory light chain 2                             |
| 7                          | LOC105275345   | LOC105275345 | ejaculatory bulb-specific protein 3                         | LOC105279314               | trypsin inhibitor                                            | LOC105283737   | myosin heavy chain, muscle                                  |
| 8                          | LOC105285923   | LOC105287552 | snakeskin protein                                           | LOC105285920               | vegetative cell wall protein gp1                             | LOC105281707   | uncharacterized LOC105281707                                |
| 9                          | LOC105277525   | LOC105277525 | uncharacterized LOC105277525                                | LOC105284141               | speckle-type POZ protein B                                   | LOC105287552   | snakeskin protein                                           |
| 10                         | LOC105287552   | LOC105279933 | leucine-rich repeat-containing G-protein coupled receptor 4 | LOC105282036               | G2/mitotic-specific cyclin-B                                 | LOC105278758   | actin                                                       |
| 11                         | LOC105276573   | LOC105276573 | leucine-rich repeat neuronal protein 2                      | LOC105287714               | protein hunchback                                            | LOC105276573   | leucine-rich repeat neuronal protein 2                      |
| 12                         | LOC105278724   | LOC105283737 | myosin heavy chain, muscle                                  | LOC105281786               | hyaluronan mediated motility receptor                        | LOC105281721   | uncharacterized LOC105281721                                |
| 13                         | LOC105281012   | LOC105276433 | box A-binding factor                                        | LOC105284119               | ribonuclease H-like                                          | LOC105281786   | hyaluronan mediated motility receptor                       |
| 14                         | LOC105281708   | LOC105277700 | actin, clone 205                                            | LOC105281784               | transcription termination factor 2                           | LOC105277700   | actin, clone 205                                            |
| 15                         | LOC105288201   | LOC105277377 | troponin C                                                  | LOC105288201               | uncharacterized LOC105288201                                 | LOC105277377   | troponin C                                                  |
| 16                         | LOC105284141   | LOC105282359 | myosin regulatory light chain 2                             | LOC105287010               | uncharacterized LOC105287010                                 | LOC105275507   | PDZ and LIM domain protein 3                                |
| 17                         | LOC105282036   | LOC105287093 | uncharacterized LOC105287093                                | LOC105283509               | zinc finger BED domain-containing protein 1-like             | LOC105279933   | leucine-rich repeat-containing G-protein coupled receptor 4 |
| 18                         | LOC105284181   | LOC105287812 | uncharacterized LOC105287812                                | LOC105279586               | uncharacterized LOC105279586                                 | LOC105277728   | uncharacterized LOC105277728                                |
| 19                         | LOC105287714   | LOC105281721 | uncharacterized LOC105281721                                | LOC105284633               | gliomedin                                                    | LOC105280772   | uncharacterized LOC105280772                                |
| 20                         | LOC105277435   | LOC105285936 | glutathione S-transferase 1-1                               | LOC105287013               | kinesin-like protein KIF20B                                  | LOC105279907   | uncharacterized LOC105279907                                |
| 21                         | LOC105276433   | LOC105278758 | actin                                                       | LOC105283233               | fibrillin-1                                                  | LOC105279559   | glycine receptor subunit alpha-2-like                       |
| 22                         | LOC105275236   | LOC105281449 | muscle M-line assembly protein unc-89-like                  | LOC105283266               | lymphoid-specific helicase                                   | LOC105283796   | ornithine decarboxylase 2-like                              |
| 23                         | LOC105287193   | LOC105280202 | glycine-rich cell wall structural protein                   | LOC105278524               | LIRP - ILP2                                                  | LOC105285920   | vegetative cell wall protein gp1                            |
| 24                         | LOC105281920   | LOC105275821 | dnaJ homolog subfamily C member 22                          | LOC105283796               | ornithine decarboxylase 2-like                               | LOC105276699   | uncharacterized LOC105276699                                |
| 25                         | LOC105283615   | LOC105287204 | twitchin                                                    | LOC105283366               | uncharacterized LOC105283366                                 | LOC105282680   | glucosylceramidase                                          |
| 26                         | LOC105279559   | LOC105276699 | uncharacterized LOC105276699                                | LOC105277551               | glycine N-methyltransferase                                  | LOC105281428_Q | queen Vg                                                    |
| 27                         | LOC105287812   | LOC105275435 | alpha-(1,3)-fucosyltransferase 6                            | LOC105287207               | kinesin-like protein Klp61F                                  | LOC105281103   | pancreatic triacylglycerol lipase-like                      |
| 28                         | LOC105281784   | LOC105279012 | uncharacterized LOC105279012                                | LOC105287679               | kinetochore protein NDC80 homolog                            | LOC105277939   | uncharacterized LOC105277939                                |
| 29                         | LOC105278931   | LOC105278924 | uncharacterized LOC105278924                                | LOC105274638               | kinesin-like protein KIF18A                                  | LOC105275854   | annulin                                                     |
| 30                         | LOC105277551   | LOC105275769 | uncharacterized LOC105275769                                | LOC105284779               | uncharacterized LOC105284779                                 | LOC105287317   | actin, muscle-like                                          |
| 31                         | LOC105285920   | LOC105287317 | actin, muscle-like                                          | LOC105284181               | peptidyl-prolyl cis-trans isomerase D                        | LOC105281449   | muscle M-line assembly protein unc-89-like                  |
| 32                         | LOC105283621   | LOC105277469 | tubulin beta chain                                          | LOC105287093               | uncharacterized LOC105287093                                 | LOC105284373   | myosin light chain alkali                                   |
| 33                         | LOC105279939   | LOC105275469 | sarcalumenin                                                | LOC105276433               | box A-binding factor                                         | LOC105281784   | transcription termination factor 2                          |
| 34                         | LOC105283366   | LOC105287714 | protein hunchback                                           | LOC105279939               | lymphokine-activated killer T-cell-originated protein kinase | LOC105281010   | uncharacterized LOC105281010                                |
| 35                         | LOC105281245   | LOC105284373 | myosin light chain alkali                                   | LOC105278724               | fatty acid synthase-like                                     | LOC105280202   | glycine-rich cell wall structural protein                   |
| 36                         | LOC105275821   | LOC105281448 | twitchin                                                    | LOC105287758               | uncharacterized LOC105287758                                 | LOC105285169   | sperm flagellar protein 2                                   |
| 37                         | LOC105281786   | LOC105284497 | intraflagellar transport protein 46 homolog                 | LOC105275039               | uncharacterized LOC105275039                                 | LOC105277551   | glycine N-methyltransferase                                 |
| 38                         | LOC105283233   | LOC105281212 | protein rhomboid                                            | LOC105280537               | uncharacterized LOC105280537                                 | LOC105277439   | ADP-ribosylation factor-like protein 6                      |
| 39                         | LOC105277056   | LOC105284074 | phospholipase B1, membrane-associated                       | LOC105279590               | uncharacterized LOC105279590                                 | LOC105275469   | sarcalumenin                                                |
| 40                         | LOC105279064   | LOC105281920 | aminopeptidase N-like                                       | LOC105281082               | uncharacterized LOC105281082                                 | LOC105287204   | twitchin                                                    |
