# Supplementary material for: Clonal raider ant brain transcriptomics identifies candidate molecular mechanisms for reproductive division of labor
Source: PubMed Central journal article supplement (PMC6090591; doi:10.1186/s12915-018-0558-8), 2018-08-13
Supplement: 12915_2018_558_MOESM10_ESM.pdf [file 12915_2018_558_MOESM10_ESM.pdf]

Summary of clusters enriched for differentially expressed genes (DEGs) and transcription factor binding sites (TFBSs).

| Cluster #                  | Time interval with maximal change in expression | Maximum change vector | Number of genes in the cluster | Number of DEGs in the cluster | TFBSs in the cluster                                                                                                                                                                                                                                                               |
|----------------------------|-------------------------------------------------|-----------------------|--------------------------------|-------------------------------|------------------------------------------------------------------------------------------------------------------------------------------------------------------------------------------------------------------------------------------------------------------------------------|
| Reproduction to brood care |                                                 |                       |                                |                               |                                                                                                                                                                                                                                                                                    |
| 8                          | 12-24 hrs                                       | -0.35                 | 134                            | 48                            | <i>fkh</i>                                                                                                                                                                                                                                                                         |
| 93                         | 0-12 hrs                                        | 0.25                  | 134                            | 16                            | <i>Mad, usp, opa, btd, h, brk</i>                                                                                                                                                                                                                                                  |
| 90                         | 24-48 hrs                                       | 0.16                  | 151                            | 30                            | <i>Mad, usp, opa, btd, h, hkb</i>                                                                                                                                                                                                                                                  |
| 70                         | 24-48 hrs                                       | 0.22                  | 162                            | 45                            | <i>Mad, usp, opa, Trl</i>                                                                                                                                                                                                                                                          |
| Brood care to reproduction |                                                 |                       |                                |                               |                                                                                                                                                                                                                                                                                    |
| 19                         | 48-96 hrs                                       | 0.59                  | 245                            | 58                            | <i>fkh</i>                                                                                                                                                                                                                                                                         |
| 21                         | 48-96 hrs                                       | -0.28                 | 315                            | 25                            | <i>Mad, usp, opa, btd, Trl, h, brk, gcm2, dl, Ets21C</i>                                                                                                                                                                                                                           |
| 4                          | 48-96 hrs                                       | 1.16                  | 156                            | 31                            | <i>ap, Awh, br, btn, C15, CG11617, CG18599, CG32105, CG32532, CG4328-RA, CG9876, Dbx, Dll, ems, en, eve, exex, fkh, gt, H2.0, hbn, HGTX, inv, lab, lbl, Lim1, Lim3, lms, NK7.1, onecut, otp, pb, PHDP, Pph13, repo, ro, Rx, Scr, Six4, slou, slp1, unpg, Vsx1, Vsx2, zen, zen2</i> |
| 35                         | 0-12 hrs                                        | -0.57                 | 167                            | 19                            | <i>al, Awh, CG11294, CG32532, CG9876, Dr, en, exex, ftz, hbn, ind, inv, Lim1, OdsH, otp, Pph13, repo, ro, Rx, slou, unc-4, unpg, Vsx1, Vsx2</i>                                                                                                                                    |

Maximum change vector: magnitude and direction of the largest average gene expression change between time intervals. TFBS classes identified are as follows: Basic leucine zipper factors (bZIP) – *gt*; C2H2 zinc finger factors – *br, btd, hkb, opa, Trl, opa*; Fork head / winged helix factors – *fkh, slp1*; GCM domain factors – *gcm2*; Homeo domain factors – *al, ap, Awh, btn, C15, CG11294, CG11617, CG18599, CG32105, CG32532, CG4328-RA, CG9876, Dbx, Dll, Dr, ems, en, eve, exex, ftz, H2.0, hbn, HGTX, ind, inv, lab, lbl, Lim1, Lim3, lms, NK7.1, OdsH, onecut, otp, pb, PHDP, Pph13, repo, ro, Rx, Scr, Six4, slou, unc-4, unpg, Vsx1, Vsx2, zen, zen2*; Nuclear receptors with C4 zinc fingers – *usp*; Rel homology region (RHR) factors – *dl*; SMAD/NF-1 DNA-binding domain factors – *Mad*; Zipper-type – *h*; Tryptophan cluster factors – *Ets21C*.
