# Supplementary material for: Clonal raider ant brain transcriptomics identifies candidate molecular mechanisms for reproductive division of labor
Source: PubMed Central journal article supplement (PMC6090591; doi:10.1186/s12915-018-0558-8), 2018-08-13
Supplement: 12915_2018_558_MOESM12_ESM.pdf [file 12915_2018_558_MOESM12_ESM.pdf]

Number of replicates in the analyses (after outlier removal).

| Transition           | BR transition |          |          |          |          | RB transition |          |          |          |          |
|----------------------|---------------|----------|----------|----------|----------|---------------|----------|----------|----------|----------|
| Time point           | Ctl           | 12h      | 24h      | 48h      | 96       | Ctl           | 12h      | 24h      | 48h      | 96h      |
| Number of replicates | <b>4</b>      | <b>8</b> | <b>8</b> | <b>8</b> | <b>8</b> | <b>4</b>      | <b>8</b> | <b>8</b> | <b>8</b> | <b>8</b> |
